# 1 **Identifying conservation priorities in a defaunated tropical** 2 **biodiversity hotspot**

3  
4 Andrew Tilker<sup>1,2</sup>, Jesse F. Abrams<sup>1</sup>, An Nguyen<sup>1</sup>, Lisa Hörig<sup>1</sup>, Jan Axtner<sup>1</sup>, Julie Louvrier<sup>1</sup>,  
5 Benjamin M. Rawson<sup>3</sup>, Hoa Anh Nguyen Quang<sup>3</sup>, Francois Guegan<sup>4</sup>, Thanh Van Nguyen<sup>1,5</sup>,  
6 Minh Le<sup>5,6</sup>, Rahel Sollmann<sup>7</sup>, & Andreas Wilting<sup>1</sup>

7  
8 <sup>1</sup> Department of Ecological Dynamics, Leibniz Institute for Zoo and Wildlife Research,  
9 Berlin, Germany

10 <sup>2</sup> Global Wildlife Conservation, Austin, Texas, USA

11 <sup>3</sup> World Wildlife Fund for Nature, Hanoi, Vietnam

12 <sup>4</sup> World Wildlife Fund for Nature, Vientiane, Lao PDR

13 <sup>5</sup> Central Institute for Natural Resources and Environmental Studies, Vietnam National  
14 University, Hanoi, Vietnam

15 <sup>6</sup> Department of Environmental Ecology, Faculty of Environmental Sciences, Hanoi  
16 University of Science, Hanoi, Vietnam

17 <sup>7</sup> Department of Wildlife, Fish, and Conservation Biology, University of California Davis,  
18 Davis, California, USA

19

20

21 **Aim:** Unsustainable hunting is leading to widespread defaunation across the tropics. To  
22 mitigate against this threat with limited conservation resources, stakeholders must  
23 make decisions on where to focus anti-poaching activities. Identifying priority areas in a  
24 robust way allows decision-makers to target areas of conservation importance,  
25 therefore maximizing the impact of conservation interventions.

26 **Location:** Annamite mountains, Vietnam and Laos.

27 **Methods:** We conducted systematic landscape-scale surveys across five study sites (four  
28 protected areas, one unprotected area) using camera-trapping and leech-derived  
29 environmental DNA. We analyzed detections within a Bayesian multi-species occupancy  
30 framework to evaluate species responses to environmental and anthropogenic  
31 influences. Species responses were then used to predict occurrence to unsampled  
32 regions. We used predicted species richness maps and occurrence of endemic species to  
33 identify areas of conservation importance for targeted conservation interventions.

34 **Results:** Analyses showed that habitat-based covariates were uninformative. Our final  
35 model therefore incorporated three anthropogenic covariates as well as elevation, which  
36 reflects both ecological and anthropogenic factors. Conservation-priority species tended  
37 to found in areas that are more remote now or have been less accessible in the past, and  
38 at higher elevations. Predicted species richness was low and broadly similar across the  
39 sites, but slightly higher in the more remote site. Occupancy of the three endemic species  
40 showed a similar trend.

41 **Main conclusion:** Identifying spatial patterns of biodiversity in heavily-defaunated  
42 landscapes may require novel methodological and analytical approaches. Our results  
43 indicate to build robust prediction maps it is beneficial to sample over large spatial  
44 scales, use multiple detection methods to increase detections for rare species, include  
45 anthropogenic covariates that capture different aspects of hunting pressure, and analyze  
46 data within a Bayesian multi-species framework. Our models further suggest that more  
47 remote areas should be prioritized for anti-poaching efforts to prevent the loss of rare  
48 and endemic species.

49 **Keywords:** Annamites, camera-trapping, defaunation, environmental DNA, multi-  
50 species occupancy, species richness, tropical rainforest, unsustainable hunting

## 51 **Introduction**

52

53

54 Tropical biodiversity is declining at an alarming rate as a result of intense anthropogenic  
55 pressures (Bradshaw et al, 2009). Although habitat loss and degradation are major  
56 drivers of these declines (Rosa et al, 2016), unsustainable hunting is increasingly  
57 emerging as the primary threat to wildlife in tropical biodiversity hotspots (Benítez-  
58 López et al, 2017). Large and medium-sized mammals tend to be particularly vulnerable  
59 to hunting because they often occur at lower average population densities, have lower  
60 intrinsic rates of increase, and longer generation times (Bodmer et al, 1997; Cardillo et  
61 al, 2005; Davidson et al, 2009). Indeed, the “empty forest syndrome” that Redford  
62 (1992) warned about almost three decades ago is now a commonplace phenomenon  
63 and, given the ever-increasing demand for wildlife products in the world’s tropical  
64 regions (Rosen & Smith, 2010; Ripple et al, 2016), this trend is unlikely to slow in the  
65 coming years. Without urgent and effective measures to address overexploitation,  
66 tropical wildlife populations will continue to decline, and species extinctions will follow.  
67 Confronting the pantropical defaunation crisis has become one of the most important  
68 challenges facing conservation today (Bradshaw et al, 2009).

69 Defaunation has been particularly severe in Southeast Asia, where high human densities,  
70 a thriving illegal wildlife trade, weak protected area governance, and rapid  
71 infrastructure development have synergistically contributed to unsustainable,  
72 industrial-scale hunting (Duckworth et al, 2012; Wilcove et al, 2013; Harrison et al,  
73 2016). Within Southeast Asia, the Annamites ecoregion on the border of Vietnam and  
74 Laos has undergone severe defaunation as a result of widespread illegal hunting  
75 (Harrison et al, 2016; Timmins et al, 2016). Poaching in the Annamites is primarily  
76 accomplished by the setting of indiscriminate wire snares (Gray et al, 2018). Numerous

77 mammals are regionally extinct (Walston et al, 2010; Brook et al, 2014), and even once  
78 common species now survive at low densities (Duckworth et al, 2016). High levels of  
79 unsustainable hunting pressure are particularly worrisome from a conservation  
80 perspective, because the region is home to several endemic mammal species. Mammals  
81 restricted to this ecoregion include the saola *Pseudoryx nghetinhensis*, large-antlered  
82 muntjac *Muntiacus vuquangensis*, Annamites dark muntjac species complex *Muntiacus*  
83 *rooseveltorum* / *truongsonensis*, Owston's civet *Chrotogale owstoni*, and Annamite  
84 striped rabbit *Nesolagus timminsi* (Tordoff et al, 2003; Hurley et al, 2005; Long et al,  
85 2005). Taken together, the high poaching pressure and unique biodiversity in the  
86 Annamites make it one of the highest priority tropical regions in the world for the  
87 prevention of imminent hunting-driven extinctions.

88 To maximize the effectiveness of conservation interventions to prevent unsustainable  
89 hunting in tropical biodiversity hotspots, it is imperative to make optimal use of limited  
90 conservation resources. In the Annamites, the magnitude of the snaring crisis (Gray et al,  
91 2018), coupled with nascent protected area enforcement capacities and lack of sufficient  
92 resources, has overwhelmed efforts to adequately reduce this threat at the landscape  
93 level. Given these limitations, targeting snare removal efforts to specific areas within a  
94 landscape may be critical to reduce snaring to levels that would allow population  
95 recovery. To implement this approach, it is first necessary to identify priority areas. In  
96 the Annamites, areas that harbor threatened and endemic species are top priorities for  
97 targeted *in situ* protection measures. These species often occur at low densities, and are  
98 therefore particularly susceptible to local extirpation. To identify priority areas, it is  
99 important to apply appropriate analytical techniques. Species distribution modeling  
100 provides an ideal framework for mapping spatial patterns of biodiversity, and thus  
101 identifying conservation-priority areas (Rodríguez et al, 2007; Guisan et al, 2013).

102 There are, however, two fundamental challenges to the modeling of species distributions  
103 in tropical rainforest environments. First, tropical mammal species are often difficult to  
104 detect because they are rare, elusive, and occur at low densities. Second, even when  
105 these species can be detected, it may be difficult to obtain enough data to construct  
106 robust species distribution models (Cayuela et al, 2009), particularly in defaunated  
107 areas, where mammal populations are depleted.

108 Advances in noninvasive survey methods and statistical modeling techniques provide  
109 ways to address these challenges. Two noninvasive methods have revolutionized  
110 surveys for tropical mammals: camera-traps (Tobler et al, 2008) and high-throughput  
111 sequencing of environmental DNA (eDNA) (Bohmann et al, 2013). Camera-traps are a  
112 well-established method, and have been used to gather data on even the rarest of  
113 tropical mammal species (Whitfield, 1998; Raloff, 1999; Ganas & Lindsell, 2010). The  
114 use of eDNA is relatively new but shows considerable promise. Invertebrate-derived  
115 DNA (iDNA) approaches using terrestrial hematophagous leeches, in particular, have  
116 proven adept at detecting tropical mammals (Schnell et al, 2012; Schnell et al, 2018;  
117 Weiskopf et al, 2018). Recently, Abrams et al (2019) showed that combining camera-  
118 trapping and iDNA leech data has the potential to improve detection probabilities for  
119 tropical mammal species beyond what would be provided by each method  
120 independently. The joint camera-trap and iDNA approach thus opens new possibilities  
121 for obtaining detections of elusive tropical rainforest mammals, which in turn can be  
122 used to build robust species distribution models.

123 Even with improved detection methods and combined datasets, however, it may not be  
124 possible to obtain sufficient records for rare species. This shortfall represents a major  
125 issue because the rarest species are often the species of highest conservation concern.  
126 Multi-species occupancy models offer an analytical framework to address this challenge,

127 as species with few detections borrow information from more abundant species, which  
128 allows parameter estimation for rare species (Tobler et al, 2015; Drouilly et al, 2018; Li  
129 et al, 2018). Because species-specific responses to covariates can be projected to  
130 unsampled areas, this approach can be used to generate maps of species potential  
131 occurrence (MacKenzie et al, 2017; Sollmann et al. 2017).

132 Here, we collected a landscape-scale systematic camera-trapping and iDNA dataset  
133 across a protected area complex in the central Annamites landscape to identify priority  
134 areas for targeted conservation interventions. We used a multi-species occupancy  
135 framework and environmental and anthropogenic covariates to estimate species  
136 occurrence and predict species richness across the surveyed landscape. Our prediction  
137 maps provide insight into where to focus conservation efforts among individual study  
138 sites at the landscape scale, and more specifically can inform deployment of snare-  
139 removal teams within protected areas. We discuss our results within the context of  
140 informing targeted conservation interventions to prevent further defaunation, and  
141 species extinctions, within tropical biodiversity hotspots.

142

## 143 **Methods**

144

145

### 146 **Study area**

147 We conducted landscape-scale surveys in a large contiguous forest in the central  
148 Annamites landscape of Vietnam and Laos. The study area spans both countries and is  
149 divided into five administrative units. In Vietnam, we surveyed three sites: Bach Ma  
150 National Park (NP), the Hue Saola Nature Reserve (NR), and the Quang Nam Saola NR. In  
151 Laos, we surveyed the eastern section of Xe Sap National Protected Area (NPA) and an

152 adjacent ungazetted forest near the village of Ban Palé (Fig. 1). Together these areas  
153 comprise approximately 900 km<sup>2</sup> of mountainous terrain with elevations ranging  
154 between 100 – 2000 m asl. The dominant habitat type is wet evergreen tropical  
155 rainforest. Although the wider central Annamites region has experienced extensive past  
156 disturbance from defoliation and logging, habitat loss, degradation, and fragmentation  
157 within the past 20 years has been minimal within our study sites (Meyfroidt et al, 2008;  
158 Matusch, 2014). At the landscape scale, forest structure and habitat type are consistent  
159 across the study sites, characterized by mature secondary forest with a multi-tiered  
160 closed canopy (Fig. S1). The Vietnam sites are surrounded by a densely-populated  
161 matrix consisting of human settlements, agricultural fields, and timber plantations.  
162 Human population density in the Lao sites is low and, aside from small-scale shifting  
163 cultivation, the landscape surrounding the survey areas has not been heavily modified.  
164 However, Vietnamese incursion into these areas for poaching and illegal gold mining is  
165 widespread (Tilker, 2014), and has been facilitated by the recent construction of a road  
166 connecting Vietnam and Laos that bisects the Palé area.

167 Poaching pressure is high across the landscape (Wilkinson 2016; WWF, 2017). Measures  
168 to mitigate illegal hunting differ in intensity and effectiveness among the five sites.  
169 Patrolling in Bach Ma NP is not intensive and has received less technical and financial  
170 support than the adjacent sites. The Hue and Quang Nam Saola NRs have benefited from  
171 WWF investment in enforcement since 2011 under the Carbon and Biodiversity (CarBi)  
172 project, maintaining active Forest Guard patrol teams to strengthen enforcement  
173 capacities in the field and provision of capacity development in patrol strategy, data  
174 collection and adaptive management for park staff. The Forest Guard teams are  
175 comprised of local community members and their primary role is to remove wire snares  
176 and destroy poacher camps (Wilkinson, 2017). Between 2011 and 2017, the patrols

177 removed > 110,000 snares from the Hue and Quang Nam Saola NRs (WWF, 2017). The  
178 eastern section of Xe Sap NPA has also benefited from WWF-supported snare removal  
179 operations, although these efforts have not been as regular or intensive as in the Saola  
180 NRs. There are no active patrols in Palé, as it is outside of the Xe Sap NPA.

## 181 **Data collection and preparation**

182 We conducted systematic camera-trapping and leech surveys from November 2014 –  
183 December 2016. We set up a total of 140 camera-trap stations: 53 stations in Bach Ma  
184 NP, 21 in the Hue Saola NR, 25 in the Quang Nam Saola NR, 15 in eastern Xe Sap NPA,  
185 and 26 in the Palé area (Fig. 1; Table S2). Stations were spaced approximately 2.5 km  
186 apart (mean =  $2.47 \pm 0.233$ ), aiming at spatial independence of sampling locations, and  
187 left in the forest for a minimum of 60 days (mean =  $71.60 \pm 16.39$ ). Cameras were set 20  
188 – 40 cm off the ground, operational 24 hour/day, and programmed to take a three-photo  
189 burst with no delay between photographic events. To maximize detection probabilities,  
190 we set two camera-traps (Hyperfire Professional PC850, Reconyx®, Holmen, USA) at  
191 each station facing different directions. We treated the two cameras as a single station in  
192 our analyses. Camera-trap data was managed using the package *camtrapR* (Niedballa et  
193 al, 2015). We excluded arboreal species from our final species list, as these species are  
194 unlikely to be reliably detected by camera-traps placed at ground-level (Abrams et al,  
195 2018). We also removed rodents and squirrels, given the difficulty of identifying these  
196 mammals to species-level using camera-trap images alone, and all domestic animals.

197 We complemented camera-trapping with the collection of terrestrial haematophagous  
198 leeches around the camera-trap stations. Leeches were collected once during camera-  
199 trap setup and again during retrieval. In Vietnam, leeches were collected in 20 x 20m  
200 sampling plots set up to assess microhabitat characteristics (see below). In Laos, we



201 collected leeches in a grid around each camera trap station, with one camera-trap  
202 station per grid. We altered the leech collection strategy in Laos because sampling  
203 occurred during the dry season; increasing spatial coverage around the stations allowed  
204 us to collect leech numbers similar to the Vietnam sites. We separated the two types of  
205 leeches, brown and tiger, because the leeches potentially differ in their feeding behavior  
206 (Schnell et al 2015). All leeches of the same type from the same station and occasion  
207 were combined and processed as one leech bulk sample. Leeches were immediately  
208 placed in *RNAlater* and stored long-term at -20° C.

209 Leeches were processed using the laboratory procedures and bioinformatics pipeline  
210 described in Axtner et al (2019). The workflow is designed to minimize the risk of false  
211 positives that could arise from laboratory artifacts or misidentification during  
212 taxonomic assignment. To address these risks, it employs different levels of replication  
213 (i.e. extraction, PCRs), a curated reference database, and the probabilistic taxonomic  
214 assignment method PROTAX (Somervuo et al, 2017) that has been shown to be robust  
215 even when reference databases are incomplete (Rodgers et al., 2017, Richardson et al.,  
216 2017). Leech samples were digested, DNA was extracted, and then mitochondrial target  
217 DNA of host species was amplified with PCR and sequenced using Illumina high-  
218 throughput sequencing. We trained PROTAX models and weighted them toward 127  
219 mammal and bird species expected to occur in the study area by assigning a prior  
220 probability of 90% to these species and a 10% probability to all others (Somervuo et al,  
221 2017; see Table S2 for full weighted species list). Our protocol was slightly modified  
222 from Axtner et al (2019) in that we amplified the mitochondrial marker 16S in six PCR  
223 replicates for all samples and used genetic markers 12S and CytB only for samples  
224 where taxonomic assignment was still uncertain due to interspecific invariance or  
225 missing references (e.g. porcupines, viverrids, muntjacs). We accepted a species

226 assignment when it was present in at least two independent PCR replicates (Axtner et al.  
227 2019, Abrams et al. 2019). As with the camera-trapping data, we excluded arboreal  
228 species, rodents, squirrels, and domestic animals from the final species list.

## 229 **Covariates**

230 We hypothesized that mammal occurrence may be influenced by both environmental  
231 and anthropogenic factors. We measured three environmental features that characterize  
232 different aspects of microhabitat structure: canopy closure, vegetation density, and leaf  
233 litter. We used canopy closure as an indication of forest degradation, with lower values  
234 representing more disturbed habitat (Chazdon, 2003). Previous studies have shown that  
235 vegetation density may be an important microhabitat feature for some tropical  
236 mammals (Goulart et al, 2009; Martin et al, 2015; Mathai et al, 2017). Leaf litter impacts  
237 multiple aspects of vegetation community composition (Facelli & Pickett, 1991). It is  
238 also an important microhabitat for invertebrates and small vertebrates (Burghouts et al,  
239 1992; Vitt & Caldwell, 1994), which are important food resources for insectivores and  
240 small carnivores.

241 To assess microhabitat features, we set up a 20 x 20 m plot around the camera-trap  
242 stations, with the centerpoint halfway between the two cameras, and oriented along the  
243 cardinal axes. To measure canopy closure we took vertical photographs at the  
244 centerpoint and at the corners of the grid. Canopy photographs were manually  
245 converted to black and white images using the GNU Image Manipulation Program (GIMP,  
246 2017). We calculated percentage canopy closure (white pixels) for each image using *R*  
247 3.4.0 (R Development Core Team, 2016). Values for each image were averaged to give a  
248 single canopy closure value for each station. To measure vegetation density we took  
249 photographs in each cardinal direction of a 1 x 1.5 m orange sheet positioned 10 m from

250 the centerpoint. Photographs were processed using the canopy closure protocol, giving a  
251 single average vegetation density value for each station. We measured leaf litter percent  
252 cover in nine 1 x 1 m subplots located at the centerpoint, 10 m from the centerpoint in  
253 each cardinal direction, and at the plot corners. Each subplot was visually assigned a  
254 value from 0 to 4 based on the amount of leaf litter versus bare ground visible in each  
255 plot. Leaf litter values were averaged to give a single value for each station. For a  
256 detailed explanation of the microhabitat assessment see Abrams et al (2018).

257 In addition to the environmental covariates, we measured anthropogenic features that  
258 approximate hunting pressure. We use proxies for hunting pressure, rather than direct  
259 measures, for two reasons. First, we are not aware of any existing datasets that directly  
260 measure hunting pressure within our study sites. Second, robustly assessing poaching  
261 represents a difficult undertaking because illegal hunting is such a cryptic phenomenon.  
262 Although some studies have used presence or absence of people from camera-trapping  
263 data to represent direct measures of hunting pressure (Dias et al, 2019), such measures  
264 are not applicable in our landscape, because some local communities are allowed to  
265 legally enter the study sites to collect non-timber forest products. Further complicating  
266 the situation is the fact that these local people may engage in both legal non-timber  
267 forest product collection and illegal hunting in order to maximize potential profit. Given  
268 the difficulties in assessing hunting directly, we used measures of accessibility as proxies  
269 for hunting pressure in our study sites. Previous studies have shown accessibility and  
270 hunting to be correlated (Rao et al, 2005; Espinosa et al, 2014; Koerner et al, 2017). We  
271 used three covariates that capture different aspect of accessibility: distance from major  
272 cities, village density, and least cost path from major roads. We used city distance as a  
273 proxy for hunting pressure captured at the landscape scale. Although we measure  
274 distance to the nearest major city (Hue or Da Nang, both with population > 350,000), we

275 also interpret this covariate as an approximation of accessibility to the densely-  
276 populated coastal areas of Vietnam. We chose to measure distance to the cities, rather  
277 than other points along the urbanized coastal areas, because Hue and Da Nang are  
278 known to be major hubs for the illegal wildlife trade (VanSong, 2003; Sandalj et al,  
279 2016). Given the volume of bushmeat that passes through these markets (Sandalj et al,  
280 2016), it is likely that these urban population centers create substantial natural resource  
281 demand shadows across the landscape, as has been shown in other tropical regions (Ape  
282 Alliance, 1998). We derived the city distance covariate by calculating the Euclidean  
283 distance from the camera-trap stations to the nearest major city using the package  
284 *gDistance* (Van Etten, 2017), then taking the lower of the two values. The city distance  
285 covariate is measured in meters, with increasing values indicating more remote areas.  
286 We then took the log of the covariate to approximate the non-linear effect that  
287 increasing distance likely has on accessibility. Village density serves as a proxy for  
288 hunting at the local scale. Local villagers often supplement their income by providing  
289 bushmeat to the bushmeat markets in regional towns and cities, and are therefore a  
290 primary driver of poaching in the central Annamites (MacMillan & Nguyen, 2014).  
291 Studies in other tropical regions have demonstrated mammal depletions surrounding  
292 local villages (Rao et al, 2005; Koerner et al, 2017; Abrahams et al, 2017). To calculate  
293 village density we first created a ground-truthed point shapefile layer documenting local  
294 villages around our study sites. We then created a heatmap in QGIS 2.18.9 (QGIS  
295 Development Team, 2016) using the village shapefile as the input point layer. To create  
296 the heatmap, we used the default quartic kernel decay function and set the radius to 15  
297 km. The village density radius was chosen so that all individual sampling stations in our  
298 study landscape were covered in the final heatmap. Observations in the field indicate  
299 that all stations, even those in the most in the most remote areas, were subject to some

300 level of hunting pressure. We then used the extract function in the raster package  
301 (Hijmans, 2019) to obtain heatmap values for each station. The village density covariate  
302 is unitless, with lower values indicating areas that are more remote. Finally, the least  
303 cost path covariate also serves as a proxy for hunting pressure at the local scale.  
304 However, it differs from the village density measure in two fundamental ways. First, the  
305 least cost path covariate explicitly incorporates accessibility based on terrain  
306 ruggedness characteristics, therefore providing a more accurate representation of  
307 remoteness than linear measures. Second, we calculated the least cost path covariate  
308 over three time periods (1994, 2004, and 2014) to better capture the amount of time  
309 that an area has been subjected to poaching pressure. The least cost path covariate  
310 therefore captures both spatial and temporal dimensions. To create the least cost path  
311 covariate we first used the timelapse function in Google Earth Engine (Gorelick et al,  
312 2017) to generate a GIS layer of major roads in and around our study site for three time  
313 periods: 1994, 2004, and 2014. We converted the roads layer to points in QGIS. Next, we  
314 used the R package *movecost* (Alberti, 2018) to calculate travel time along least cost path  
315 routes from the stations to the nearest 50 points along the road layer, using a shuttle  
316 radar topography mission (SRTM) 30 m digital elevation model as the cost surface  
317 raster, and then selected the lowest value as the final least cost path value. We averaged  
318 the three values to give a single least cost path value for each station, which we use as an  
319 approximation of the time that an area has been accessible over the past 20 years. The  
320 roads least cost path covariate is measured in hours, with higher values indicating areas  
321 that take longer to access, and are therefore more remote.

322 We also included elevation as a covariate in our models. We consider elevation as both  
323 an anthropogenic and ecological covariate. Because higher elevation areas are more  
324 difficult to access, elevation serves as a measure of remoteness within our landscape.

325 Elevation is also linked to a complex range of ecological attributes in the central  
326 Annamites, including subtle variations in forest structure and microclimate (Tordoff et  
327 al, 2003; Long, 2005).

328 We standardized all covariates. We tested for correlations between all possible pairs of  
329 covariates using Pearson's correlation plots. None of our covariates were highly  
330 correlated ( $r < 0.6$ ; Fig. S2).

### 331 **Modeling framework**

332 We adopted a hierarchical multi-species occupancy model to estimate species occupancy  
333 and richness (Dorazio & Royle, 2005; Dorazio et al., 2006). Occupancy models estimate  
334 the probability of species occupancy,  $\psi$ , while accounting for species detection,  $p$ , using  
335 repeated species detection/non-detection data collected across multiple sampling  
336 locations (MacKenzie et al., 2003). To convert camera-trapping data to an occupancy  
337 format, we divided the active camera-trapping time for each station into 10-day  
338 sampling periods, yielding a minimum of six occasions for each station. We chose to use  
339 a 10-day sampling period to minimize zero-inflation in the detection history matrix. We  
340 treated each leech collection event as a separate occasion for the stations. We defined  $z_{ij}$   
341 as the true occupancy state (0 or 1) of species  $i$  at sampling station  $j$ . Occupancy state  
342 can be modeled as a Bernoulli random variable with the success probability  $\psi_{ij}$ , the  
343 occupancy probability of species  $i$  at site  $j$ . We defined  $p_{ijk}$  as detection probability for  
344 species  $i$  at station  $j$  during the  $k$ th sampling occasion, and  $y_{ijk}$  the observation (i.e.,  $y_{ijk} =$   
345 1 if species  $i$  is observed at site  $j$ , occasion  $k$ , and 0 otherwise). Observing a species is  
346 conditional on its occurrence, so that  $y_{ijk}$  can be modeled as a Bernoulli random variable  
347 with success probability  $z_{ij} \cdot p_{ijk}$ .

348 Covariate effects on both parameters can be modeled on the logit scale. We included  
349 habitat and anthropogenic covariates on  $\psi_{ij}$  to investigate their potential effects on  
350 species occurrence. To avoid overparametrizing the model, we first ran single-covariate  
351 models using each of the seven covariates that we selected *a priori*, and assessed  
352 covariate importance by evaluating effect sizes for each species in the community.  
353 Because the environmental covariates did not show strong effects on occupancy, with all  
354 species having 95% BCIs overlapping zero and most species showing overlapping 75%  
355 Bayesian Confidence Intervals (BCIs) (Fig. S3), these covariates were not included in the  
356 final model. Our final community model included four covariates on  $\psi_{ij}$ : city distance,  
357 village density, roads least cost path, and elevation. Following Abrams et al (2019), we  
358 used survey method (camera-trap, brown leech, or tiger leech) as a covariate on  $p$ . We  
359 accounted for varying survey effort by including number of days each camera-trap  
360 station was operational during each 10-day occasion or number of leeches per sample  
361 on  $p$ .

362 We implemented the models in a Bayesian framework using JAGS (Plummer, 2003)  
363 accessed through the package rjags (Plummer, 2018). We used vague priors (e.g. normal  
364 distributions with mean zero and variance 100 for community-level occupancy and  
365 detection coefficients). We ran three parallel Markov chains with 250,000 iterations, of  
366 which we discarded 50,000 as burn-in. We assessed chain convergence using the  
367 Gelman-Rubin statistic, with values close to 1 indicating convergence (Gelman et al,  
368 2004). We report results as posterior mean and standard deviation. We consider a  
369 coefficient to have strong support if the 95% Bayesian confidence interval (95% BCI, the  
370 2.5% and 97.5% percentiles of the posterior distribution) does not overlap zero, and  
371 moderate support if the posterior 75% BCI does not overlap zero. The full model  
372 description is provided in Appendix 1.

373 To test for spatial autocorrelation in response variables not accounted for by predictor  
374 variables, we followed an approach put forth by Moore and Swihart (2003). We  
375 calculated Moran's I using the `moransI` function from the R package `lctools` for residuals  
376 from occupancy models using a neighborhood distance of 2.5 km (average spacing of our  
377 sampling stations). We only found evidence of low to moderate spatial autocorrelation  
378 in occupancy model residuals in only 2 of the 23 species analyzed. We acknowledge that  
379 for these species we may underestimate occupancy. However, our analysis is concerned  
380 with comparisons of patterns across study sites, not among species, and for a given  
381 species, any bias should be similar across the sites. Estimates of Moran's I and associated  
382 p-values for species are shown in Appendix 2.

383 To predict species richness across the landscape we first divided the study area into 200  
384 x 200 m grid cells. We included proposed extensions for the Hue and Quang Nam Saola  
385 Nature Reserves in the prediction area. Next, we derived covariate values for each cell.  
386 For the city distance, village density, and roads least cost path covariates we followed  
387 the same protocols described above. Elevation values were extracted from an SRTM 30  
388 m digital elevation model (see Fig. S4 for covariate rasters). We used estimates of the  
389 coefficients from the multi-species model linking covariates to occupancy probability to  
390 predict occupancy values for each species and grid cell and then summed the occupancy  
391 probabilities for all species per cell to produce species richness maps. To highlight areas  
392 of high richness for conservation-priority species, we produced a separate species  
393 richness map for the endemic species and those listed as Near Threatened or higher on  
394 *The IUCN Red List of Threatened Species*. To provide a further level of detail for the  
395 endemic species, we also produced single-species occupancy maps for Annamite striped  
396 rabbit, Annamite dark muntjac, and Owston's civet. We note that, although our sampling  
397 stations only covered part of the study sites, covariate values at the stations were largely



398 representative of values across the sites. When we filtered the raster cells to remove  
399 cells that fell outside the range of our covariates at the sampling stations, we found that  
400 a small number raster cells were excluded. However, we present the full prediction  
401 maps here, both because the differences between the complete and filtered rasters were  
402 minor, and for visualization purposes (see Fig S5 for modified prediction maps).

403 We further used a modified Bray-Curtis index to assess compositional dissimilarity  
404 among the five study sites. The Bray-Curtis index calculates dissimilarity values by  
405 comparing composition in a reference assemblage with one or more target assemblages  
406 (Bray & Curtis, 1957). We adapted the index to compare predicted species occupancy  
407 probabilities between all possible site combinations, following the general framework  
408 proposed by Giacomini & Galetti (2013). To do this we sampled random values from the  
409 posterior distributions of species-specific occupancy probabilities for both the focal and  
410 target study sites. We repeated this procedure 30,000 times using Monte Carlo sampling  
411 to generate a distribution of values and took the mean of the posterior distribution. The  
412 final value gives an indication of how dissimilar the predicted community-level  
413 occupancies are among the sites. Dissimilarity values can range between -1 and 1. A  
414 value of 0 indicates no differences in occupancy between the focal and reference sites, a  
415 value of 1 indicates complete dissimilarity with the reference site having higher  
416 occupancies than the focal site, and a value of -1 indicates complete dissimilarity with  
417 the focal site having higher occupancies than the reference site. We calculated Bray-  
418 Curtis dissimilarities first for the entire community, and then for endemic and  
419 threatened species. Further details on the Bray-Curtis dissimilarity index are provided  
420 in Appendix 3.

421

## 422 Results

423 We obtained data from 139 camera-trap stations totaling 17,393 trap-nights (Table S1).  
424 The camera-trapping yielded 5,261 independent detections ( $\Delta = 60$  min between  
425 subsequent pictures of the same species at the same camera trap) of 27 terrestrial  
426 mammals. We identified all mammals to species, with the exception of the ferret badgers  
427 (*Melogale personata* and *M. moschata*) and pangolins (*Manis pentadactyl* and *M.*  
428 *javanica*), which we identified to the genus level due to the difficulty of identifying to  
429 species using camera-trap photographs, and the Annamite dark muntjac species  
430 complex *Muntiacus rooseveltorum* / *truongsonensis*, due to its unresolved taxonomic  
431 status. Our final species list resulted in 22 mammals. We obtained 193 leech samples  
432 totaling 2,043 leeches (1,888 brown, 155 tiger) from 98 stations (mean leeches / station  
433 = 21, standard deviation = 22; Table S1). We were able to amplify and sequence DNA  
434 from 104 samples. PROTAX identified 25 mammals to the species level and 7 to the  
435 genus level. The final species list from the leeches included 19 terrestrial mammals.  
436 Overall, the two survey methods provided similar species lists. The exceptions were  
437 pangolin, pig-tailed macaque *Macaca leonina*, spotted linsang *Prionodon pardicolor*, and  
438 yellow-bellied weasel *Mustela kathiah*, which were detected only in the camera-traps,  
439 and marbled cat *Pardofelis marmorata*, which was detected only in the leeches. The final  
440 species list used for the community occupancy analysis included 23 mammals. Four of  
441 these were threatened, three were Annamite endemics, and one species fit both  
442 categories. The full species list and classifications can be found in Table S3.

443 Detection probabilities ( $p$ ) within the mammal community varied among species and  
444 with respect to survey method. Estimates of occupancy ( $\psi$ ) showed extreme  
445 heterogeneity among individual species. Estimates of  $p$  and  $\psi$  can be found in Fig. S6,  
446 and full model results are provided in Table S4.

447 Species-specific responses to the covariates were highly variable within the community  
448 (Fig. 2). Six species showed a moderate positive relationship with city distance, three  
449 species showed a moderate negative relationship, and four species showed a strong  
450 negative relationship. There was a moderate positive effect of elevation on occupancy  
451 for nine species and a strong positive effect for four species. One species showed a  
452 moderate negative response to elevation and three species showed a strong negative  
453 response. There was a moderate positive relationship for elevation at the community  
454 level. Five species showed a moderate positive response to the road least cost path  
455 covariate. Three species showed a moderate negative relationship with this covariate  
456 and one species had a strong negative response. Most species showed a negative  
457 relationship with village density, with 16 species having a moderate negative  
458 relationship and four species showing a strong negative relationship. The community  
459 response for the village density covariate showed a strong negative response.

460 Average predicted species richness for the full community was substantially lower than  
461 the total number of species detected in the study, and was similar among the study sites  
462 (Table 1, Fig. 3A). The Palé area had slightly higher predicted species richness than the  
463 other four areas. Richness of threatened and endemic species followed a similar pattern,  
464 with all sites showing low richness relative to the total number of conservation-priority  
465 species detected, and the highest richness in the Palé area (Table 1, Fig. 3B). Predicted  
466 occupancies for the three Annamite endemic mammals showed heterogeneity among  
467 species and sites (Table 1, Fig. 4). Annamite dark muntjac had the highest predicted  
468 occupancy, followed by Annamite striped rabbit, followed by Owston's civet. All three  
469 endemics had highest predicted occupancies in the Palé area, followed by Xe Sap NPA,  
470 Quang Nam Saola NR, Hue Saola NR, and finally Bach Ma NP. Single-species occupancy  
471 predictions for all species can be found in S7.

472 The Bray-Curtis dissimilarity index values showed similar values for full community  
473 occupancies among Bach Ma NP, the Hue and Quang Nam Saola NRs, and Xe Sap NPA  
474 (Table 2). However, the Palé area had negative and high defaunation index values when  
475 compared to every other site, indicating that occupancies for the full suite of species are  
476 higher for this area. Dissimilarity values for endemic and threatened species showed a  
477 similar pattern. The fact that Palé area showed negative and higher dissimilarity values  
478 for both the full community and for conservation-priority species suggests that, within  
479 the context of species occurrence, the site has undergone less severe defaunation than  
480 the other sites.

481

## 482 **Discussion**

483

484 Our study highlights the landscape-scale effects of unsustainable hunting on the  
485 occurrence and distribution of terrestrial mammals within a tropical biodiversity  
486 hotspot. For a structurally-intact tropical rainforest habitat, average predicted species  
487 richness (7.02) was low (Table 1; Fig. 3A & B). For comparison, Deere et al (2018) found  
488 a predicted species richness of 14.12 in logged forests in Malaysian Borneo, and a  
489 richness of 4.54 in adjacent oil palm plantations. Given the largely homogenous  
490 landscape-scale forest structure and habitat in our study sites, the low predicted species  
491 richness is likely indicative of a community that has undergone severe hunting-driven  
492 defaunation. The extent of faunal impoverishment is further supported by the fact that  
493 we failed to record almost half of the mammal community would be expected to occur in  
494 these sites based on historical distribution maps (Tilker & Abrams, *in press*).

495 At the landscape level predicted richness was broadly similar among the five study sites,  
496 although the more remote Palé area showed the highest richness values, especially for

497 the endemic and threatened species (Fig. 3). The Bray-Curtis dissimilarity values show a  
498 similar geographic pattern, with the Palé area having higher dissimilarity values  
499 compared to the other four areas, indicating less defaunation (Table 2). For the three  
500 endemic species, Bach Ma NP showing the lowest predicted occupancy, followed by the  
501 Hue Saola NR, Quang Nam Saola NR, Xe Sap NPA, and Palé. These findings indicate a  
502 strong landscape-scale defaunation gradient for the three endemic species (Fig. 4). Our  
503 covariate responses suggest that this gradient reflects an increasing level of remoteness  
504 (Fig. 2). Bach Ma NP lies near densely-populated coastal areas of Vietnam, has lower  
505 average elevations, and has been accessible for decades by a well-established road  
506 network. In the westernmost section is the Palé area, which is far from major cities, has  
507 few villages, higher elevations, and has only recently been accessible by road. The Saola  
508 NRs and Xe Sap NPA fall between these two extremes. Furthermore, these areas have  
509 had some level of active enforcement in the last few years, which may have slowed the  
510 decline of mammal populations.

511 Our results provide information that is directly applicable to conservation planning in  
512 this landscape. From a biogeographic perspective, protecting the Palé area is a top  
513 priority for the conservation of threatened and endemic species. Indeed, it may be the  
514 only place in our survey sites to harbor Owston's civet, Asian black bear *Ursus*  
515 *thibetanus*, and marbled cat (Fig. S7). Our predictive maps offer a robust scientific  
516 framework to support ongoing initiatives to grant Palé formal protected area status as a  
517 first step to implementing active protection measures. Our maps also provide  
518 information to guide targeted snare-removal efforts within protected areas. This  
519 information is especially useful for the Hue and Quang Nam Saola NRs, where WWF and  
520 local partners are operating snare-removal teams, but have not yet been able to  
521 significantly reduce snaring pressure across the wider protected area complex

522 (Wilkinson, 2016). We suggest that, to maximize the impact of snare-removal efforts on  
523 conservation-priority species, the teams should focus on the more remote areas along  
524 the border of the two reserves, and in the border area of the Quang Nam Saola NR and  
525 Bach Ma NP. It is possible that these areas have maintained higher occupancies of  
526 conservation-priority species because they are more difficult to access and, as a result,  
527 have cumulatively experienced less snaring pressure. However, remoteness will not  
528 protect these areas for long. An increase in road development in recent years has  
529 created a situation where even the most remote locations in the Saola NRs can now be  
530 reached within a single day from the nearest access point, meaning that no area is  
531 inaccessible for a motivated hunter. Given the likely relationship between accessibility  
532 and increased hunting pressure, it seems inevitable that, in the absence of scaled-up  
533 enforcement efforts, snaring pressure will continue to increase in the more remote  
534 areas, especially as other parts of the protected areas become increasingly empty and  
535 poachers are forced to travel further distances to maintain comparable levels of offtake  
536 (Kümpel et al, 2010). Although threatened and endemic species appear to be absent  
537 from much of Bach Ma NP, there are isolated high-elevation areas that should be  
538 considered for intensive anti-poaching efforts. Our models indicate that the border areas  
539 of eastern Xe Sap NPA Area have undergone moderate to severe defaunation. Given that  
540 this area appears to be heavily hunted by Vietnamese poachers (Tilker, 2014), such a  
541 finding is not unexpected. The eastern section of the protected area is nonetheless a top  
542 priority for continued protection efforts, both because it may be a stronghold for the  
543 endemic Annamite striped rabbit (Fig. S7), and more generally because effective  
544 enforcement can serve as a buffer from further cross-border incursions into the Palé  
545 area. In a best-case scenario, reducing snaring pressure in core areas within this  
546 landscape could not only prevent the local extirpation of conservation-priority species,

547 but also allow their populations to rebound (see Steinmetz et al, 2010 for a case study  
548 on large mammal population recovery following mitigation of unsustainable hunting  
549 pressure).

550 In many ways, our study landscape exemplifies classical “empty forest syndrome”  
551 (Redford, 1992). All large and medium-sized predators (with the exception of Asiatic  
552 black bear), as well as all megaherbivores, appear to be locally extirpated (Tilker &  
553 Abrams et al, *in press*). Large ungulates have been hunted out from most of the  
554 landscape (Fig. S7). Yet our findings show that even in this empty forest, conservation-  
555 priority species still persist, albeit at extremely low occupancies. Based on these results,  
556 we suggest that the conservation potential of defaunated landscapes should not  
557 automatically be dismissed in the absence of comprehensive surveys. It is important that  
558 such surveys use sufficient sampling effort and be conducted over a large spatial extent  
559 for two reasons. First, species often show extreme spatial heterogeneity in defaunated  
560 landscapes because local extinctions necessarily result in reduced, often patchy,  
561 distributions. Surveys over wider areas are more likely to detect remnant populations.  
562 Second, working over larger spatial scales may better capture the underlying factors  
563 influencing species distribution, which can be especially important in landscapes  
564 characterized by complex anthropogenic pressures operating at multiple spatial scales.  
565 In our study, it was only by sampling the wider forest complex that we were able to  
566 adequately characterize the full spectrum of anthropogenic factors that appear to impact  
567 species occurrence patterns. Large-scale surveys require substantial resources. We  
568 acknowledge that, with multiple competing conservation objectives and finite resources,  
569 landscape-scale surveys may not always be possible. However, we note that because this  
570 approach can enhance the efficiency of targeted interventions, it is possible that limited  
571 conservation resources may be saved in the long term.

572 To overcome the challenge of detecting rare and elusive tropical mammal species, we  
573 used two complimentary survey methods: camera-trapping and leech collection.  
574 Although camera-trapping detected more species overall, leeches provided our sole  
575 detection for marbled cat, and doubled the number of records for two rare species,  
576 Owston's civet and Asian black bear. Moreover, while camera-trapping detection  
577 probabilities were higher for most species in our analysis, leeches had higher average  
578 detection rates for both Asian black bear and the endemic dark muntjac (Fig. S7). Our  
579 results are consistent with the findings of Abrams et al (2019) that demonstrate the  
580 advantages of using both camera-trapping and eDNA to increase detection probabilities  
581 for tropical mammals. We further suggest that because utilizing multiple methods may  
582 increase detections of rare species, this approach could be especially important when  
583 surveying faunally impoverished systems. Future surveys using joint detection methods  
584 need not rely only on leeches but could use other sources of eDNA, such as water (Ushio  
585 et al, 2017) or ticks (Garipey et al, 2012), or incorporate other noninvasive sampling  
586 techniques, such as acoustic monitoring devices (Kalan et al, 2015). The Bayesian  
587 modeling approach that we used, adapted from Abrams et al (2019), is flexible with  
588 regard to the underlying detection method used to generate spatial or temporal  
589 replicates.

590 We found that species occurrence in our study area appears to be primarily driven by  
591 anthropogenic factors, with no strong influence from the habitat covariates that we  
592 assessed in our models (Fig. S3). The lack of a strong signal with the habitat covariates  
593 was unexpected, given the importance of vegetation structure in explaining mammal  
594 occurrence patterns in other tropical rainforests (Goulart et al, 2009; Mathai et al, 2017;  
595 Sollmann et al, 2017). One possible explanation is that, as anthropogenic pressures in a  
596 landscape increase, ecological relationships weaken. Several hypothetical scenarios



597 could give rise to this situation. Spatially nonrandom hunting pressure could, for  
598 example, differentially impact areas of preferred habitat, leaving higher occupancies in  
599 less suitable areas. Alternatively, intensive hunting across a landscape could drive  
600 stochastic local extinctions, leaving remnant populations that are distributed randomly  
601 with respect to habitat. Regardless of the underlying process, the failure of habitat-based  
602 indices to reflect faunal biodiversity, thus the “environmental decoupling” of species-  
603 habitat relationships, has broad implications. Biodiversity assessments that rely solely  
604 on remote-sensed habitat-based measures may provide information that is inaccurate  
605 because they do not accurately capture species occurrence patterns. Recently, a growing  
606 number of scientists have called for the development of standardized remote-sensing  
607 parameters, often referred to as Satellite Remote-Sensing Essential Biodiversity  
608 Variables (SRS-EBVs), to monitor biodiversity at the global scale (O'Connor et al, 2015;  
609 Skidmore et al, 2015; Pettorelli et al, 2016). While we acknowledge the value of earth  
610 observation data to provide insight into biodiversity patterns and processes at large  
611 scales (Bush et al, 2017), our results indicate that remote-sensed habitat-based  
612 measures may provide little information on the status or distribution of wildlife in  
613 defaunated landscapes. In tropical rainforests subject to hunting pressure, there is likely  
614 no substitute for large-scale *in situ* surveys to collect primary biodiversity data.

615 Our results underscore the importance of incorporating anthropogenic factors in studies  
616 that seek to explain or predict species occurrence in landscapes characterized by high  
617 human pressure. Furthermore, our findings suggest that to build robust distribution  
618 models it may be beneficial to incorporate a diverse suite of anthropogenic covariates  
619 that capture different aspects of this pressure. We used measures of village density and  
620 city distance as proxies for accessibility at the local and landscape scales, respectively.  
621 Previous studies have shown the impact of similar accessibility measures on wildlife

622 communities at different spatial scales (Schuette et al, 2013; Koerner et al, 2017; Torres  
623 et al, 2018). Our least cost path covariate adds an additional dimension to these  
624 accessibility measures, both because it takes into account the ruggedness of the terrain  
625 in our landscape, and because it is calculated over a 20-year window. We see potential  
626 for further development of anthropogenic covariates that include both spatial and  
627 temporal components. Finally, we use elevation as a proxy for both local accessibility  
628 and a complex set of ecological attributes. The relative contribution of anthropogenic  
629 and environmental traits to species occurrence along elevational gradients in the  
630 Annamites represents an intriguing question. Future studies in the region that measure  
631 a wider range of microhabitat characteristics, and ideally are conducted in areas under  
632 less severe hunting pressure, may provide insight into this issue.

633 Given the current magnitude of hunting across the world's tropical rainforests  
634 (Harrison, 2011; Ripple et al, 2016; Benítez-López et al, 2017), and future projections for  
635 population growth (Gerland et al, 2014) and road expansion in developing countries  
636 (Lawrence et al, 2014), it is likely that defaunation will become increasingly prevalent in  
637 tropical regions. Confronting the pantropical defaunation crisis will require a well-  
638 resourced, multi-faceted approach from conservation stakeholders worldwide. Because  
639 specific threats and potential solutions necessarily depend on local context, effective  
640 strategies to prevent unsustainable hunting must be site-specific. One constant that is  
641 applicable to conservation initiatives in all tropical hotspots, however, is that resources  
642 are limited. We show that, within this context, understanding spatial patterns of  
643 defaunation can help stakeholders prioritize areas for conservation activities, and  
644 therefore more effectively use finite conservation resources.

645

646 **References**

- 647 Abrahams, M. I., Peres, C. A., & Costa, H. C. (2017). Measuring local depletion of  
648 terrestrial game vertebrates by central-place hunters in rural Amazonia. *PLoS One*,  
649 12(10), e0186653.
- 650 Abrams, J. F., Axtner, J., Bhagwat, T., Mohamed, A., Nguyen, A., Niedballa J., Sollmann,  
651 R., Tilker, A., & Wilting, A. (2018). *Studying terrestrial mammals in tropical rainforests. A*  
652 *user guide for camera-trapping and environmental DNA*. Leibniz-IZW, Berlin, Germany.
- 653 Abrams, J.F., Hoerig, L., Brozovic, R., Axtner, J., Crampton-Platt, A., Mohamed, A., Wong,  
654 S.T., Sollmann, R., Douglas, W.Y. & Wilting, A. (2019). Shifting up a gear with iDNA: From  
655 mammal detection events to standardised surveys. *Journal of Applied Ecology*.
- 656 Alberti, Gianmarco. (2018). Movecost: Calculation of accumulated cost surface and least-  
657 cost paths related to human movement across the landscape. R package version 3.4.0.  
658 <https://CRAN.R-project.org/package=movecost>
- 659 Ape Alliance, 1998. *The African Bushmeat Trade — A Recipe for Extinction* (Cambridge,  
660 UK).
- 661 Axtner, J.; Crampton-Platt, A., Hörig, L., Mohamed, A., Xu, C.C.Y., Yu, D.W., & Wilting, A.  
662 (2019). An efficient and improved laboratory workflow and tetrapod database for larger  
663 scale eDNA studies. *GigaScience* <https://doi.org/10.1093/gigascience/giz029>
- 664 Bender, Johannes. (2012). Illegale Abholzung im Xe Sap Nationalpark in Laos –eine  
665 physiogeographische Studie auf der Grundlage von Fernerkundungsdaten und  
666 Feldarbeiten. (unpublished Master's thesis). Johann Wolfgang Goethe-Universität,  
667 Frankfurt am Main, Germany.

- 668 Benítez-López, A., Alkemade, R., Schipper, A. M., Ingram, D. J., Verweij, P. A., Eikelboom, J.  
669 A. J., & Huijbregts, M. A. J. (2017). The impact of hunting on tropical mammal and bird  
670 populations. *Science*, 356(6334), 180-183.
- 671 Bodmer, R. E., Eisenberg, J. F., & Redford, K. H. (1997). Hunting and the Likelihood of  
672 Extinction of Amazonian Mammals. *Conservation Biology*, 11(2), 460-466.
- 673 Bohmann, K., Schnell, I. B., & Gilbert, M. T. P. (2013). When bugs reveal biodiversity.  
674 *Molecular Ecology*, 22(4), 909-911.
- 675 Bradshaw, C. J., Sodhi, N. S., & Brook, B. W. (2009). Tropical turmoil: a biodiversity  
676 tragedy in progress. *Frontiers in Ecology and the Environment*, 7(2), 79-87.
- 677 Bray, J. R., & Curtis, J. T. (1957). An ordination of the upland forest communities of  
678 southern Wisconsin. *Ecological Monographs*, 27(4), 325-349.
- 679 Bush, A., Sollmann, R., Wilting, A., Bohmann, K., Cole, B., Balzter, H., Martius, C., Zlinszky,  
680 A., Calvignac-Spencer, S., Cobbold, C.A. & Dawson, T.P. (2017). Connecting Earth  
681 observation to high-throughput biodiversity data. *Nature Ecology & Evolution*, 1(7),  
682 0176.
- 683 Cardillo, M., Mace, G.M., Jones, K.E., Bielby, J., Bininda-Emonds, O.R., Sechrest, W., Orme,  
684 C.D.L. & Purvis, A. (2005). Multiple causes of high extinction risk in large mammal  
685 species. *Science*, 309(5738), 1239-1241.
- 686 Cayuela L, Golicher DJ, Newton AC, Kolb M, De Albuquerque FS, Arets EJ, Alkemade JR, &  
687 Pérez AM. (2009). Species distribution modeling in the tropics: problems, potentialities,  
688 and the role of biological data for effective species conservation. *Tropical Conservation*  
689 *Science*, 2(3), 319-352.

- 690 Chazdon, R. L. (2003). Tropical forest recovery: legacies of human impact and natural  
691 disturbances. *Perspectives in Plant Ecology, Evolution and Systematics*, 6(1-2), 51-71.
- 692 Davidson, A. D., Hamilton, M. J., Boyer, A. G., Brown, J. H., & Ceballos, G. (2009). Multiple  
693 ecological pathways to extinction in mammals. *Proceedings of the National Academy of  
694 Sciences*, 106(26), 10702-10705.
- 695 Deere, N.J., Guillera-Arroita, G., Baking, E.L., Bernard, H., Pfeifer, M., Reynolds, G., Wearn,  
696 O.R., Davies, Z.G. & Struebig, M.J. (2018). High Carbon Stock forests provide co-benefits  
697 for tropical biodiversity. *Journal of Applied Ecology*, 55(2), 997-1008.
- 698 Dias, D. D. M., Lima Massara, R., de Campos, C. B., & Henrique Guimarães Rodrigues, F.  
699 (2019). Human activities influence the occupancy probability of mammalian carnivores  
700 in the Brazilian Caatinga. *Biotropica*, 51(2), 253-265.
- 701 Dorazio, R. M., Royle, J. A., Söderström, B., & Glimskär, A. (2006). Estimating species  
702 richness and accumulation by modeling species occurrence and detectability. *Ecology*,  
703 87(4), 842-854.
- 704 Dorazio, R.M. & Royle, J.A. (2005) Estimating size and composition of biological  
705 communities by modeling the occurrence of species. *Journal of the American Statistical  
706 Association*, 100, 389-398.
- 707 Drinkwater, R., Schnell, I.B., Bohmann, K., Bernard, H., Veron, G., Clare, E., Gilbert, M.T.P.  
708 and Rossiter, S.J. (2019). Using metabarcoding to compare the suitability of two blood-  
709 feeding leech species for sampling mammalian diversity in North Borneo. *Molecular  
710 Ecology Resources*, 19(1), 105-117.

- 711 Drouilly, M., Clark, A., & O'Riain, M. J. (2018). Multi-species occupancy modelling of  
712 mammal and ground bird communities in rangeland in the Karoo: A case for dryland  
713 systems globally. *Biological Conservation*, 224, 16-25.
- 714 Duckworth, J.W., Batters, G., Belant, J.L., Bennett, E.L., Brunner, J., Burton, J., Challender,  
715 D.W., Cowling, V., Duplaix, N., Harris, J.D., Hedges, S., Long, B., Mahood, S. P, McGowan, P.  
716 J. K., McShea, W. J., Oliver, W. L. R., Perkin, S., Rawson, B. M., Shepherd, C. R., Stuart, S. N.,  
717 Talukdar, B. K., van Dijk, P. P., Vié, J-C., Walston, J. L., Whitten, T., & Wirth, R. (2012).  
718 Why South-east Asia should be the world's priority for averting imminent species  
719 extinctions, and a call to join a developing cross-institutional programme to tackle this  
720 urgent issue. *Surveys and Perspectives Integrating Environment and Society*, 5.2.
- 721 Duckworth, J.W., Timmins, R., Chutipong, W., Gray, T.N.E., Long, B., Helgen, K., Rahman,  
722 H., Choudhury, A. & Willcox, D.H.A. (2016). *Arctonyx collaris*. *The IUCN Red List of*  
723 *Threatened Species* 2016: e.T70205537A45209459.
- 724 Espinosa, S., Branch, L. C., & Cueva, R. (2014). Road development and the geography of  
725 hunting by an Amazonian indigenous group: consequences for wildlife conservation.  
726 *PloS One*, 9(12), e114916.
- 727 Facelli, J. M., & Pickett, S. T. (1991). Plant litter: its dynamics and effects on plant  
728 community structure. *The Botanical Review*, 57(1), 1-32.
- 729 Ganas, J., & Lindsell, J. A. (2010). Photographic evidence of Jentink's duiker in the Gola  
730 Forest Reserves, Sierra Leone. *African Journal of Ecology*, 48(2), 566-568.
- 731 Garipey, T. D., Lindsay, R., Ogden, N., & Gregory, T. R. (2012). Identifying the last supper:  
732 utility of the DNA barcode library for bloodmeal identification in ticks. *Molecular Ecology*  
733 *Resources*, 12(4), 646-652.

- 734 Gelman, A., Carlin, J. B., Stern, H. S., & Rubin, D. B. (2004). *Bayesian Data Analysis*.  
735 Chapman and Hall, Boca Raton, FL.
- 736 Gerland, P., Raftery, A.E., Ševčíková, H., Li, N., Gu, D., Spoorenberg, T., Alkema, L., Fosdick,  
737 B.K., Chunn, J., Lalic, N. & Bay, G. (2014). World population stabilization unlikely this  
738 century. *Science*, 346(6206), 234-237.
- 739 Giacomini, H. C., & Galetti, M. (2013). An index for defaunation. *Biological Conservation*,  
740 163, 33-41.
- 741 GIMP team, (2017). GNU Image Manipulation Program. <https://www.gimp.org>.
- 742 Gorelick, N., Hancher, M., Dixon, M., Ilyushchenko, S., Thau, D., & Moore, R. (2017).  
743 Google Earth Engine: Planetary-scale geospatial analysis for everyone. *Remote Sensing of*  
744 *Environment*, 202, 18-27.
- 745 Goulart, F. V. B., Cáceres, N. C., Graipel, M. E., Tortato, M. A., Ghizoni Jr, I. R., & Oliveira-  
746 Santos, L. G. R. (2009). Habitat selection by large mammals in a southern Brazilian  
747 Atlantic Forest. *Mammalian Biology*, 74(3), 182-190.
- 748 Gray, T.N., Hughes, A.C., Laurance, W.F., Long, B., Lynam, A.J., O'Kelly, H., Ripple, W.J.,  
749 Seng, T., Scotson, L. & Wilkinson, N.M. (2018). The wildlife snaring crisis: an insidious  
750 and pervasive threat to biodiversity in Southeast Asia. *Biodiversity and Conservation*,  
751 27(4), 1031-1037.
- 752 Guisan, A., Tingley, R., Baumgartner, J.B., Naujokaitis-Lewis, I., Sutcliffe, P.R., Tulloch, A.I.,  
753 Regan, T.J., Brotons, L., McDonald-Madden, E., Mantyka-Pringle, C. & Martin, T.G. (2013).  
754 Predicting species distributions for conservation decisions. *Ecology Letters*, 16(12),  
755 1424-1435.

- 756 Harrison, R. D. (2011). Emptying the forest: hunting and the extirpation of wildlife from  
757 tropical nature reserves. *BioScience*, 61(11), 919-924.
- 758 Harrison, R.D., Sreekar, R., Brodie, J.F., Brook, S., Luskin, M., O'Kelly, H., Rao, M., Scheffers,  
759 B. & Velho, N. (2016). Impacts of hunting on tropical forests in Southeast Asia.  
760 *Conservation Biology*, 30(5), 972-981.
- 761 Hijmans, R. J. (2019). raster: Geographic Data Analysis and Modeling. R package version  
762 2.8-19. <https://CRAN.R-project.org/package=raster>
- 763 Kalan, A. K., Mundry, R., Wagner, O. J., Heinicke, S., Boesch, C., & Kühl, H. S. (2015).  
764 Towards the automated detection and occupancy estimation of primates using passive  
765 acoustic monitoring. *Ecological Indicators*, 54, 217-226.
- 766 Kéry, M., & Royle, J. A. (2016). *Applied Hierarchical Modeling in Ecology: Analysis of*  
767 *distribution, abundance and species richness in R and BUGS: Volume 1: Prelude and Static*  
768 *Models*. Academic Press.
- 769 Kéry, M., Gardner, B., & Monnerat, C. (2010). Predicting species distributions from  
770 checklist data using site-occupancy models. *Journal of Biogeography*, 37(10), 1851-1862.
- 771 Koerner, S. E., Poulsen, J. R., Blanchard, E. J., Okouyi, J., & Clark, C. J. (2017). Vertebrate  
772 community composition and diversity declines along a defaunation gradient radiating  
773 from rural villages in Gabon. *Journal of Applied Ecology*, 54(3), 805-814.
- 774 Kümpel, N. F., Milner-Gulland, E. J., Cowlshaw, G. U. Y., & Rowcliffe, J. M. (2010).  
775 Assessing sustainability at multiple scales in a rotational bushmeat hunting system.  
776 *Conservation Biology*, 24(3), 861-871.



- 777 Laurance, W.F., Clements, G.R., Sloan, S., O'connell, C.S., Mueller, N.D., Goosem, M., Venter,  
778 O., Edwards, D.P., Phalan, B., Balmford, A. and Van Der Ree, R. (2014). A global strategy  
779 for road building. *Nature*, 513(7517), 229.
- 780 Li, X., Bleisch, W. V., & Jiang, X. (2018). Using large spatial scale camera trap data and  
781 hierarchical occupancy models to evaluate species richness and occupancy of rare and  
782 elusive wildlife communities in southwest China. *Diversity and Distributions*, 24(11),  
783 1560-1572.
- 784 Long, B, Minh Hoang and Thai Truyen. (2005). *A Conservation Assessment of Quang Nam*  
785 *Province, Central Vietnam*. WWF Indochina and Quang Nam Forest Protection  
786 Department, Tam Ky, Vietnam.
- 787 Long, B. (2005). Identification of priority areas for integrated conservation management  
788 in Quang Nam Province, Vietnam. (unpublished doctoral thesis). Cambridge, UK.
- 789 MacKenzie, D. I., Nichols, J. D., Lachman, G. B., Droege, S., Andrew Royle, J., & Langtimm,  
790 C. A. (2002). Estimating site occupancy rates when detection probabilities are less than  
791 one. *Ecology*, 83(8), 2248-2255.
- 792 MacKenzie, D. I., Nichols, J. D., Royle, J. A., Pollock, K. H., Bailey, L., & Hines, J. E. (2017).  
793 *Occupancy estimation and modeling: inferring patterns and dynamics of species*  
794 *occurrence*. Elsevier.
- 795 MacMillan, D. C., & Nguyen, Q. A. (2014). Factors influencing the illegal harvest of wildlife  
796 by trapping and snaring among the Katu ethnic group in Vietnam. *Oryx*, 48(2), 304-312.
- 797 Martin, E. H., Cavada, N., Ndibalema, V. G., & Rovero, F. (2015). Modelling fine-scale  
798 habitat associations of medium-to-large forest mammals in the Udzungwa Mountains of  
799 Tanzania using camera trapping. *Tropical Zoology*, 28(4), 137-151.

800 Martyn Plummer (2018). rjags: Bayesian Graphical Models using MCMC. R package  
801 version 4-8. <https://CRAN.R-project.org/package=rjags>

802 Mathai J, Sollmann R, Meredith ME, Belant JL, Niedballa J, Buckingham L, Wong ST, Asad  
803 S, & Wilting A. (2017). Fine-scale distributions of carnivores in a logging concession in  
804 Sarawak, Malaysian Borneo. *Mammalian Biology*, 86, 56-65.

805 Mathai, J., Sollmann, R., Meredith, M.E., Belant, J.L., Niedballa, J., Buckingham, L., Wong,  
806 S.T., Asad, S. & Wilting, A. (2017). Fine-scale distributions of carnivores in a logging  
807 concession in Sarawak, Malaysian Borneo. *Mammalian Biology*, 86, 56-65.

808 Matusch, T. (2014). Islands of felicity?—The effect of land cover changes in and around  
809 protected areas: a case study of Bach Ma National Park, Vietnam. *American Journal of*  
810 *Environmental Protection*, 3(3), 152-61.

811 Meyfroidt, P., & Lambin, E. F. (2008). Forest transition in Vietnam and its environmental  
812 impacts. *Global Change Biology*, 14(6), 1319-1336.

813 Niedballa, J., Sollmann, R., Courtiol, A., & Wilting, A. (2016). camtrapR: an R package for  
814 efficient camera trap data management. *Methods in Ecology and Evolution*, 7(12), 1457-  
815 1462.

816 O'Connor, B., Secades, C., Penner, J., Sonnenschein, R., Skidmore, A., Burgess, N. D., &  
817 Hutton, J. M. (2015). Earth observation as a tool for tracking progress towards the Aichi  
818 Biodiversity Targets. *Remote Sensing in Ecology and Conservation*, 1(1), 19-28.

819 Pettorelli, N., Wegmann, M., Skidmore, A., Múcher, S., Dawson, T.P., Fernandez, M., Lucas,  
820 R., Schaepman, M.E., Wang, T., O'Connor, B. & Jongman, R.H. (2016). Framing the concept  
821 of satellite remote sensing essential biodiversity variables: challenges and future  
822 directions. *Remote Sensing in Ecology and Conservation*, 2(3), 122-131.

- 823 Plummer, M. (2013). JAGS: A program for analysis of Bayesian graphical models using  
824 Gibbs sampling. In: *Proceedings of the 3rd international workshop on distributed*  
825 *statistical computing* (Vol 124, No. 125.10).
- 826 R Core Team (2018). R: A language and environment for statistical computing. R  
827 Foundation for Statistical Computing, Vienna, Austria. URL <https://www.R-project.org/>.
- 828 Raloff, J. (1999). Rarest of the rare: Remote-camera images and dung-heap data give a  
829 portrait of Vietnam's rhinos. *Science News*, 156(10), 153-155.
- 830 Rao, M., Myint, T., Zaw, T., & Htun, S. (2005). Hunting patterns in tropical forests  
831 adjoining the Hkakaborazi National Park, north Myanmar. *Oryx*, 39(3), 292-300.
- 832 Redford, K. H. (1992). The empty forest. *BioScience*, 42(6), 412-422.
- 833 Richardson, R. T., Bengtsson-Palme, J., & Johnson, R. M. (2017). Evaluating and  
834 optimizing the performance of software commonly used for the taxonomic classification  
835 of DNA metabarcoding sequence data. *Molecular Ecology Resources*, 17(4), 760-769.
- 836 Ripple, W.J., Abernethy, K., Betts, M.G., Chapron, G., Dirzo, R., Galetti, M., Levi, T., Lindsey,  
837 P.A., Macdonald, D.W., Machovina, B. & Newsome, T.M (2016). Bushmeat hunting and  
838 extinction risk to the world's mammals. *Royal Society Open Science*, 3(10), 160498.
- 839 Rodgers, T.W., Xu, C.C., Giacalone, J., Kapheim, K.M., Saltonstall, K., Vargas, M., Yu, D.W.,  
840 Somervuo, P., McMillan, W.O. & Jansen, P.A. (2017). Carrion fly-derived DNA  
841 metabarcoding is an effective tool for mammal surveys: Evidence from a known tropical  
842 mammal community. *Molecular Ecology Resources*, 17(6), e133-e145.
- 843 Rodríguez, J. P., Brotons, L., Bustamante, J., & Seoane, J. (2007). The application of  
844 predictive modelling of species distribution to biodiversity conservation. *Diversity and*  
845 *Distributions*, 13(3), 243-251.

- 846 Rosa, I. M., Smith, M. J., Wearn, O. R., Purves, D., & Ewers, R. M. (2016). The  
847 environmental legacy of modern tropical deforestation. *Current Biology*, 26(16), 2161-  
848 2166.
- 849 Royle, J. A., & Dorazio, R. M. (2008). *Hierarchical modeling and inference in ecology: the*  
850 *analysis of data from populations, metapopulations and communities*. Elsevier.
- 851 Sandalj, M., Treydte, A. C., & Ziegler, S. (2016). Is wild meat a luxury? Quantifying wild  
852 meat demand and availability in Hue, Vietnam. *Biological Conservation*, 194, 105-112.
- 853 Schnell IB, Thomsen PF, Wilkinson N, Rasmussen M, Jensen LR, Willerslev E, Bertelsen  
854 MF, Gilbert MT. (2012). Screening mammal biodiversity using DNA from leeches. *Current*  
855 *Biology*, 22(8), R262-R263.
- 856 Schnell, I. B., Sollmann, R., Calvignac-Spencer, S., Siddall, M. E., Douglas, W. Y., Wilting, A.,  
857 & Gilbert, M. T. P. (2015). iDNA from terrestrial haematophagous leeches as a wildlife  
858 surveying and monitoring tool—prospects, pitfalls and avenues to be developed.  
859 *Frontiers in Zoology*, 12(1), 24.
- 860 Schnell, I.B., Bohmann, K., Schultze, S.E., Richter, S.R., Murray, D.C., Sinding, M.H.S., Bass,  
861 D., Cadle, J.E., Campbell, M.J., Dolch, R. Edwards, D.P, Gray, T. N. E., Hansen, T., Nguyen, A.  
862 Q. H., Noer, C. L., Heise-Pavlov, S., Sander Pedersen, A. F., Ramamonhisoa, J. C., Siddal, M.  
863 E., Tilker, A., Traeholt, C., Wilkinson, N., Woodcock, P., Yu, D. W., Bertelsen, M. F., Bunce,  
864 M., & Gilbert, M. T. P. (2018). Debugging diversity—a pan-continental exploration of the  
865 potential of terrestrial blood-feeding leeches as a vertebrate monitoring tool. *Molecular*  
866 *Ecology Resources*, 18(6), 1282-1298.

- 867 Schnell, I.B., Thomsen, P.F., Wilkinson, N., Rasmussen, M., Jensen, L.R., Willerslev, E.,  
868 Bertelsen, M.F. & Gilbert, M.T.P. (2012). Screening mammal biodiversity using DNA from  
869 leeches. *Current Biology*, 22(8), R262-R263.
- 870 Schuette, P., Wagner, A. P., Wagner, M. E., & Creel, S. (2013). Occupancy patterns and  
871 niche partitioning within a diverse carnivore community exposed to anthropogenic  
872 pressures. *Biological Conservation*, 158, 301-312.
- 873 Skidmore, A.K., Pettorelli, N., Coops, N.C., Geller, G.N., Hansen, M., Lucas, R., Múcher, C.A.,  
874 O'connor, B., Paganini, M., Pereira, H.M. and Schaepman, M.E (2015). Environmental  
875 science: Agree on biodiversity metrics to track from space. *Nature News*, 523(7561),  
876 403.
- 877 Sollmann, R., Mohamed, A., Niedballa, J., Bender, J., Ambu, L., Lagan, P., Mannan, S., Ong,  
878 R.C., Langner, A., Gardner, B. & Wilting, A. (2017). Quantifying mammal biodiversity co-  
879 benefits in certified tropical forests. *Diversity and Distributions*, 23(3), 317-328.
- 880 Somervuo, P., Koskela, S., Pennanen, J., Henrik Nilsson, R., & Ovaskainen, O. (2016).  
881 Unbiased probabilistic taxonomic classification for DNA barcoding. *Bioinformatics*,  
882 32(19), 2920-2927.
- 883 Steinmetz, R., Chutipong, W., Seuaturien, N., Chirngsaard, E., & Khaengkhetkarn, M.  
884 (2010). Population recovery patterns of Southeast Asian ungulates after poaching.  
885 *Biological Conservation*, 143(1), 42-51.
- 886 Sterling, E. J., & Hurley, M. M. (2005). Conserving biodiversity in Vietnam: Applying  
887 biogeography to conservation research. *Proceedings of the California Academy of*  
888 *Sciences*, 56, 98.

- 889 Tilker, A. (2014). *A survey of eastern areas of Xe Sap National Protected Area, Lao PDR,*  
890 *for Saola and other large ungulates; final report to Global Wildlife Conservation and the*  
891 *Saola Working Group.* World Wildlife Fund Greater Mekong Program. Vientiane, Lao  
892 PDR.
- 893 Timmins, R.J., Duckworth, J.W., Robichaud, W., Long, B., Gray, T.N.E. & Tilker, A. 2016.  
894 *Muntiacus vuquangensis.* *The IUCN Red List of Threatened Species* 2016:  
895 e.T44703A22153828.
- 896 Tobler, M. W., Carrillo-Percegue, S. E., Pitman, R. L., Mares, R., & Powell, G. (2008). An  
897 evaluation of camera traps for inventorying large-and medium-sized terrestrial  
898 rainforest mammals. *Animal Conservation*, 11(3), 169-178.
- 899 Tobler, M. W., Hartley, A. Z., Carrillo-Percegue, S. E., & Powell, G. V. (2015).  
900 Spatiotemporal hierarchical modelling of species richness and occupancy using camera  
901 trap data. *Journal of Applied Ecology*, 52(2), 413-421.
- 902 Tordoff, A., R. Timmins, R. Smith, & Vinh, M. K. (2003). *A Biological Assessment of the*  
903 *Central Truong Son Landscape.* Central Truong Son Initiative. Report No. 1. WWF  
904 Indochina, Hanoi, Vietnam.
- 905 Torres, P. C., Morsello, C., Parry, L., Barlow, J., Ferreira, J., Gardner, T., & Pardini, R.  
906 (2018). Landscape correlates of bushmeat consumption and hunting in a post-frontier  
907 Amazonian region. *Environmental Conservation*, 45(4), 315-323.
- 908 Tuanmu, M. N., & Jetz, W. (2015). A global, remote sensing-based characterization of  
909 terrestrial habitat heterogeneity for biodiversity and ecosystem modelling. *Global*  
910 *Ecology and Biogeography*, 24(11), 1329-1339.

- 911 Ushio, M., Fukuda, H., Inoue, T., Makoto, K., Kishida, O., Sato, K., Murata, K., Nikaido, M.,  
912 Sado, T., Sato, Y. and Takeshita, M. (2017). Environmental DNA enables detection of  
913 terrestrial mammals from forest pond water. *Molecular Ecology Resources*, 17(6), e63-  
914 e75.
- 915 Van Etten, J. (2017). R package gdistance: distances and routes on geographical grids.  
916 *Journal of Statistical Software*, 76 (3), 1-21.
- 917 Van Song, N. (2003). Wildlife trading in Vietnam: Why it flourishes. *Economy and*  
918 *Environment Program for Southeast Asia, International Development Research Centre*  
919 *Regional Office for Southeast and East Asia, Singapore.*
- 920 Vitt, L. J., & Caldwell, J. P. (1994). Resource utilization and guild structure of small  
921 vertebrates in the Amazon forest leaf litter. *Journal of Zoology*, 234(3), 463-476.
- 922 Weiskopf, S.R., McCarthy, K.P., Tessler, M., Rahman, H.A., McCarthy, J.L., Hersch, R., Faisal,  
923 M.M. & Siddall, M.E. (2018). Using terrestrial haematophagous leeches to enhance  
924 tropical biodiversity monitoring programmes in Bangladesh. *Journal of Applied Ecology*,  
925 55(4), 2071-2081.
- 926 Whitfield, J. (1998). Zoology: A saola poses for the camera. *Nature*, 396(6710), 410.
- 927 Wilcove, D. S., Giam, X., Edwards, D. P., Fisher, B., & Koh, L. P. (2013). Navjot's nightmare  
928 revisited: logging, agriculture, and biodiversity in Southeast Asia. *Trends in Ecology &*  
929 *Evolution*, 28(9), 531-540.
- 930 Wilkinson, N. (2016). *Report on effects of five years of snare removal patrols on snaring in*  
931 *the Thua Thien Hue - Quang Nam Saola Landscape: an analysis of data collected by Forest*  
932 *Guard patrols.* WWF CarBi project, Hanoi, Vietnam.

- 933 Wilkinson, N. (2017). *Conserving the Unknown: Decision-making for the Critically*  
934 *Endangered Saola *Pseudoryx nghetinhensis* in Vietnam*. (unpublished doctoral thesis).  
935 Cambridge, UK.
- 936 WWF. (2017). *Feasibility Study Report: CarBi Phase II*. Hanoi, Vietnam.



937 **Figures**

938

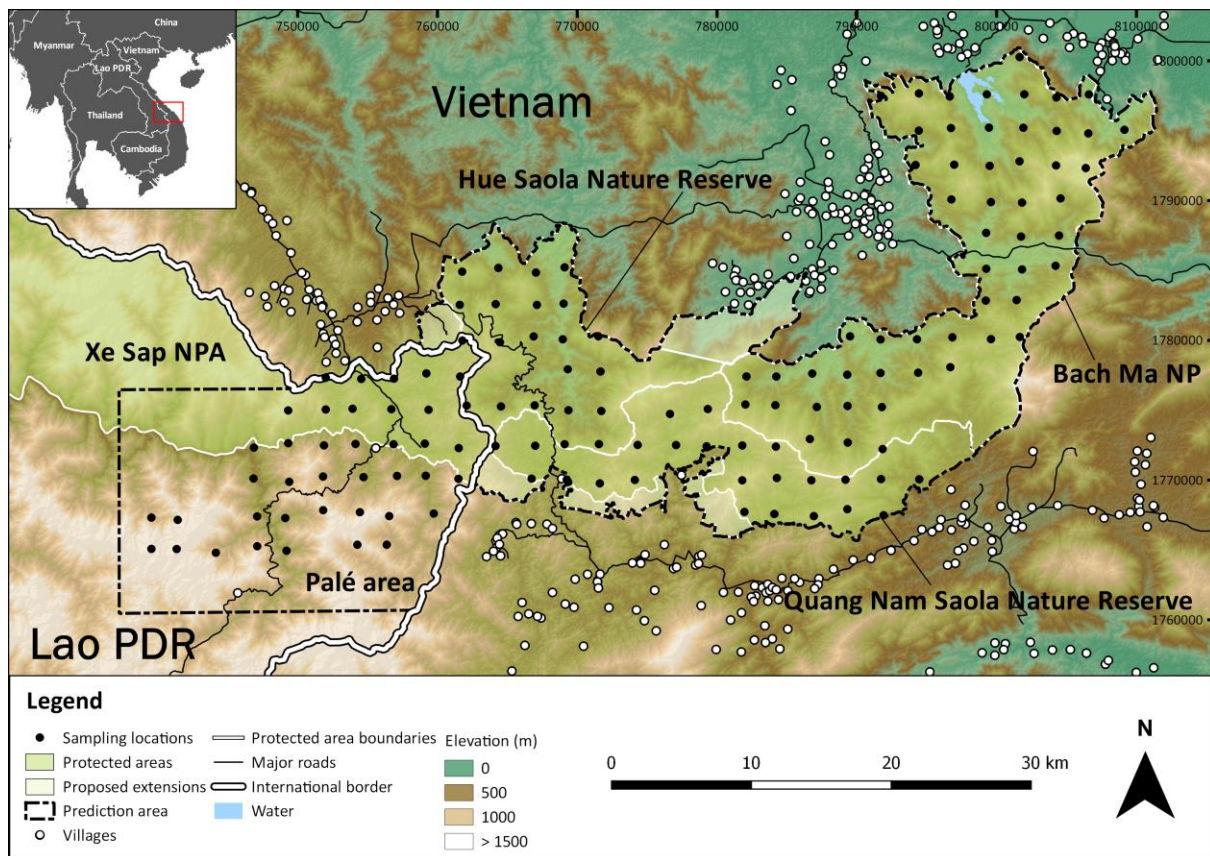

939

940 **Figure 1:** Map of camera-traps and leech collection stations across five areas in the  
941 central Annamites landscape.

942

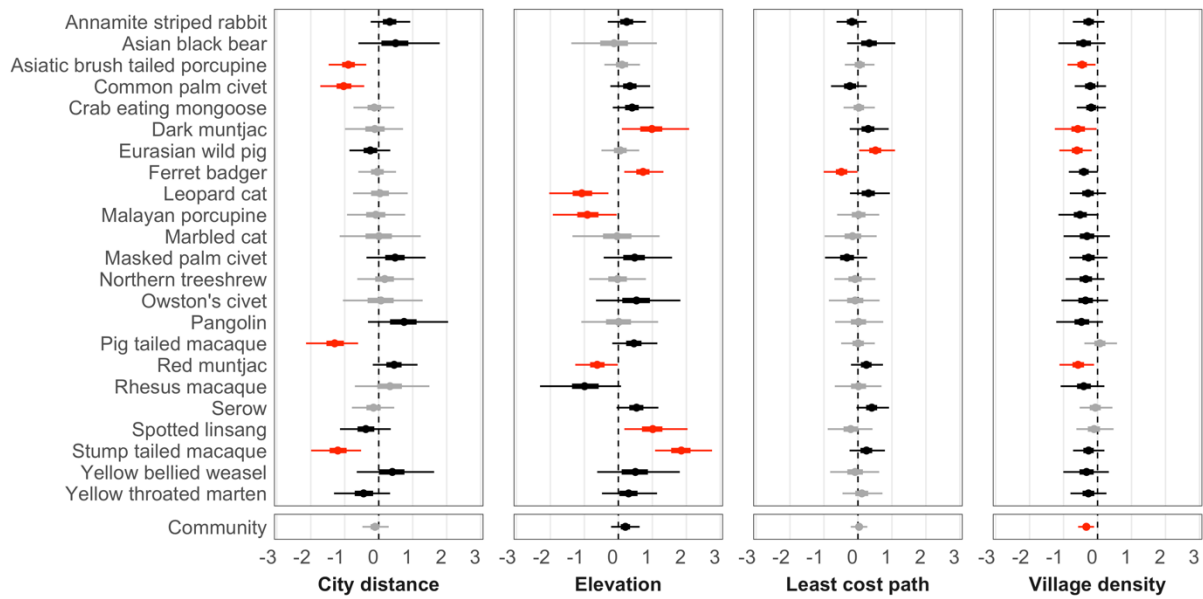

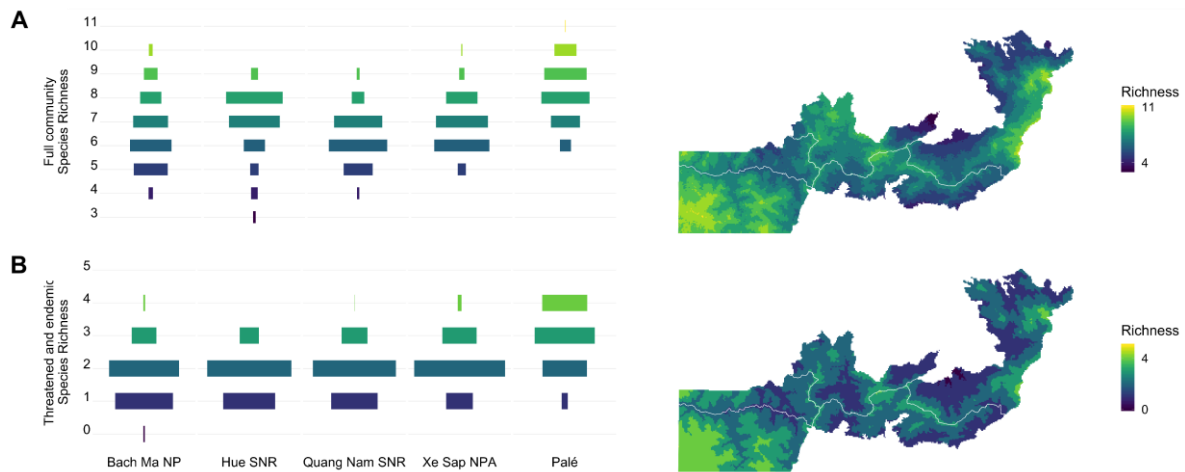

951

952 **Figure 3:** Predicted species richness across five study sites in the central Annamites  
953 landscape with histogram showing proportion of cells in each study area for predicted  
954 species numbers (left panel) and prediction map (right panel) based on community  
955 occupancy model fit to camera-trapping and iDNA data for 23 mammal species. (A)  
956 Predicted richness for all species. (B) Predicted species richness for threatened and  
957 endemic species.

958

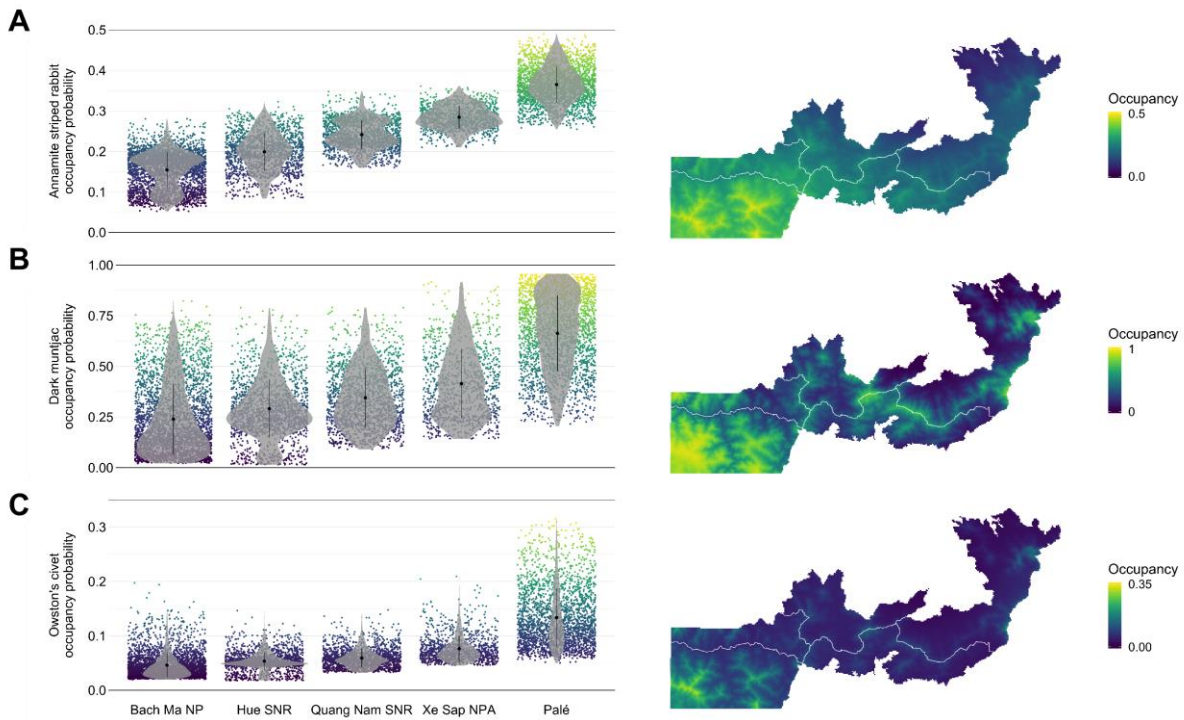

959

960 **Figure 4:** Predicted occupancies for three Annamite endemic species with violin plot  
961 showing predicted occupancy values for each of the five study sites (left panel) and  
962 prediction map (right panel) based on community occupancy model fit to camera-  
963 trapping and iDNA data for 23 mammal species. (A) Predicted occupancy for Annamite  
964 striped rabbit. (B) Predicted occupancy for Annamite dark muntjac. (C) Predicted  
965 occupancy for Owston's civet. Note that, for visualization purposes, occupancy values  
966 are scaled independently for each species. Single-species prediction maps with  
967 standardized scaling for occupancy values can be found in Fig. S7.

|                   |                                | Study site  |                    |              |             |             | All sites   |
|-------------------|--------------------------------|-------------|--------------------|--------------|-------------|-------------|-------------|
|                   |                                | Bach Ma NP  | Quang Nam Saola NR | Hue Saola NR | Xe Sap NPA  | Palé        |             |
| Species richness  | Full community                 | 6.52 ± 1.39 | 6.32 ± 1.00        | 7.00 ± 1.24  | 6.89 ± 0.98 | 8.25 ± 1.13 | 7.02 ± 1.41 |
|                   | Threatened and endemic species | 1.79 ± 0.77 | 1.80 ± 0.65        | 1.85 ± 0.66  | 2.10 ± 0.70 | 2.97 ± 0.85 | 2.12 ± 0.89 |
| Species occupancy | Annamite striped rabbit        | 0.15 ± 0.04 | 0.24 ± 0.04        | 0.20 ± 0.05  | 0.28 ± 0.03 | 0.36 ± 0.05 | 0.24 ± 0.09 |
|                   | Annamite dark muntjac          | 0.24 ± 0.18 | 0.35 ± 0.15        | 0.30 ± 0.18  | 0.41 ± 0.17 | 0.66 ± 0.19 | 0.39 ± 0.24 |
|                   | Owston's civet                 | 0.05 ± 0.02 | 0.06 ± 0.02        | 0.05 ± 0.02  | 0.08 ± 0.02 | 0.13 ± 0.05 | 0.07 ± 0.05 |

968

969 **Table 1:** Predicted species richness and species occupancies (mean ± SD) for five study sites in the central Annamites landscape, from  
970 multi-species community occupancy model fit to 23 mammal species. Full community indicates richness for all 23 species. Threatened and  
971 endemic species indicates richness for 10 species that are endemic and / or listed as Near Threatened or higher on *The IUCN Red List of*  
972 *Threatened Species*. Species occupancy shows predicted occupancies for each of the three Annamite endemic mammals. Occupancy values  
973 range from 0 to 1.

974

|                    | Bach Ma NP                           | Quang Nam Saola NR                   | Hue Saola NR                         | Xe Sap NPA                           | Palé                               |
|--------------------|--------------------------------------|--------------------------------------|--------------------------------------|--------------------------------------|------------------------------------|
| Bach Ma NP         | 0                                    | -0.0006 ± 0.0205<br>0.0431 ± 0.0205  | 0.0406 ± 0.0119<br>0.0049 ± 0.0119   | 0.0350 ± 0.0233<br>0.0841 ± 0.0233   | 0.1338 ± 0.0315<br>0.2547 ± 0.0315 |
| Quang Nam Saola NR | 0.0006 ± 0.0205<br>-0.0431 ± 0.0205  | 0                                    | 0.0412 ± 0.0206<br>-0.0382 ± 0.0205  | 0.0357 ± 0.0061<br>0.04127 ± 0.006   | 0.1346 ± 0.0193<br>0.2150 ± 0.0193 |
| Hue Saola NR       | -0.0406 ± 0.0119<br>-0.0049 ± 0.0119 | -0.0412 ± 0.0205<br>0.0382 ± 0.0206  | 0                                    | -0.0055 ± 0.0206<br>0.0793 ± 0.0206  | 0.0938 ± 0.0297<br>0.2503 ± 0.0297 |
| Xe Sap NPA         | -0.0350 ± 0.0233<br>-0.0840 ± 0.0233 | -0.0357 ± 0.0061<br>-0.0413 ± 0.006  | 0.0055 ± 0.0206<br>-0.0792 ± 0.0206  | 0                                    | 0.0995 ± 0.0174<br>0.1754 ± 0.0174 |
| Palé               | -0.1338 ± 0.0315<br>-0.2547 ± 0.0315 | -0.1346 ± 0.0193<br>-0.2149 ± 0.0192 | -0.0938 ± 0.0297<br>-0.2502 ± 0.0297 | -0.0995 ± 0.0174<br>-0.1754 ± 0.0174 | 0                                  |

975

976 **Table 2:** Bray-Curtis dissimilarity values (mean ± SE) calculated using predicted occupancy values per site for all mammal species (top  
977 value) and for threatened and endemic species (bottom value). Values range from 0 to 1, with 0 indicating complete similarity in species  
978 occupancies between the sites, and 1 indicating complete dissimilarity.
